# Supplementary material for: Sonic hedgehog-heat shock protein 90β axis promotes the development of nonalcoholic steatohepatitis in mice
Source: PubMed Central journal article supplement (PMC10859387; doi:10.1038/s41467-024-45520-8), 2024-02-12
Supplement: 41467_2024_45520_MOESM1_ESM.pdf [file 41467_2024_45520_MOESM1_ESM.pdf]

**Title: Sonic hedgehog-heat shock protein 90 $\beta$  axis promotes the development of nonalcoholic steatohepatitis in mice**

Authors: Weitao Zhang<sup>1,2</sup>, Junfeng Lu<sup>3</sup>, Lianshun Feng<sup>2</sup>, Hanyue Xue<sup>2</sup>, Shiyang Shen<sup>2</sup>, Shuiqing Lai<sup>4</sup>, PingPing Li<sup>5</sup>, Ping Li<sup>2</sup>, Jian Kuang<sup>4</sup>, Zhiwei Yang<sup>6\*</sup> and Xiaojun Xu<sup>1,2\*</sup>

**Affiliations:**

1. Department of Pharmacy, The Fourth Affiliated Hospital, Zhejiang University School of Medicine, Yiwu, Zhejiang, China; Center for Innovative Traditional Chinese Medicine Target and New Drug Research, International Institutes of Medicine, Zhejiang University, Yiwu, Zhejiang, China.
2. State Key Laboratory of Natural Medicines, China Pharmaceutical University, 210009, Nanjing, Jiangsu, China.
3. First Department of Liver Disease, Beijing You'An Hospital, Capital Medical University, Beijing 100069, China.
4. Guangdong Provincial People's Hospital, Guangdong Academy of Medical Sciences, Guangzhou, Guangdong, China.
5. State Key Laboratory of Bioactive Substance and Function of Natural Medicines, Institute of Materia Medica, Chinese Academy of Medical Sciences & Peking Union Medical College, Diabetes Research Center of Chinese Academy of Medical Sciences, Beijing, 100050, China.
6. Institute of Laboratory Animal Science, Chinese Academy of Medical Sciences (CAMS) & Peking Union Medical Collage (PUMC), Beijing, 100021, PR China.

**Corresponding author:**

Prof. Xiaojun Xu, Department of Pharmacy, The Fourth Affiliated Hospital, Zhejiang University School of Medicine, Yiwu, Zhejiang, China; Center for Innovative Traditional Chinese Medicine Target and New Drug Research, International Institutes of Medicine, Zhejiang University, Yiwu, Zhejiang, China. E-mail: [xiaojunxu@zju.edu.cn](mailto:xiaojunxu@zju.edu.cn).

Prof. Zhiwei Yang, Institute of Laboratory Animal Science, Chinese Academy of Medical Sciences (CAMS) & Peking Union Medical Collage (PUMC)

E-mail: [yangzhiwei@cnilas.pumc.edu.cn](mailto:yangzhiwei@cnilas.pumc.edu.cn).

## Supplementary figures

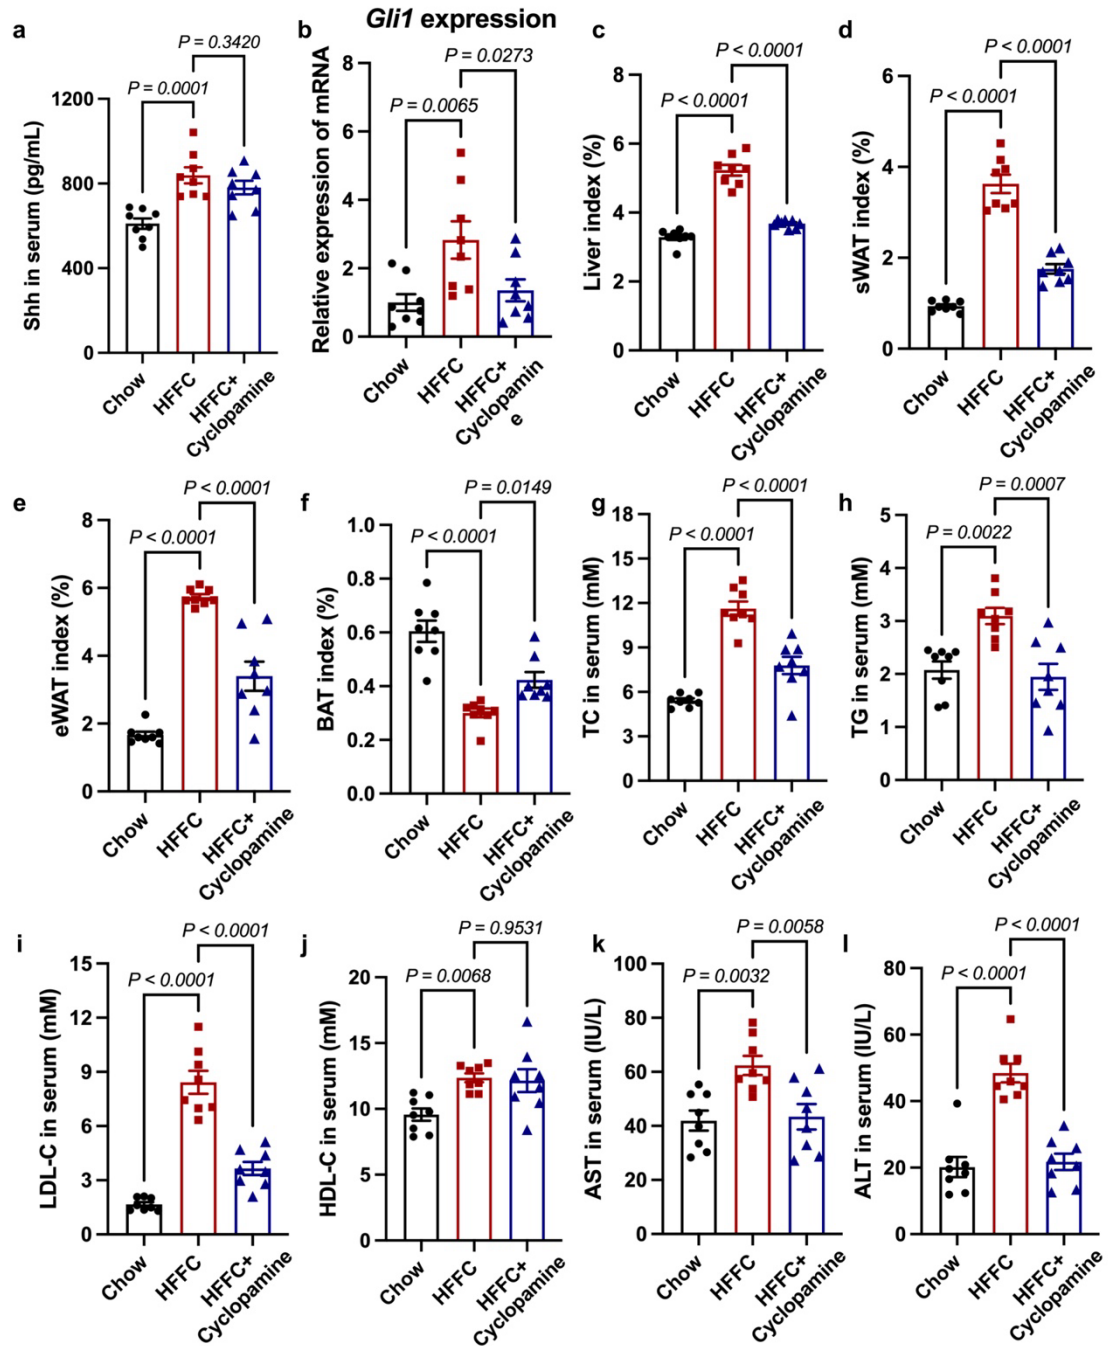

**Supplementary Figure 1 Cyclopamine protects mice from HFHC diet-induced fatty liver.** a-l Serum Shh (a), relative *Gli1* gene expression (b), Liver index (c), eWAT index (d), sWAT index (e), BAT index (f), serum TC (g), serum TG (h), serum LDL-c (i), serum HDL-c (j), Serum ALT (k), and serum AST (l) of mice on a normal chow or HFHC diet administrated with vehicle or cyclopamine (25 mg/kg) ( $n = 8$  mice per group). Data are presented as mean  $\pm$  SEM.  $n = 8$  mice per group. Source data are provided in the Source Data file.

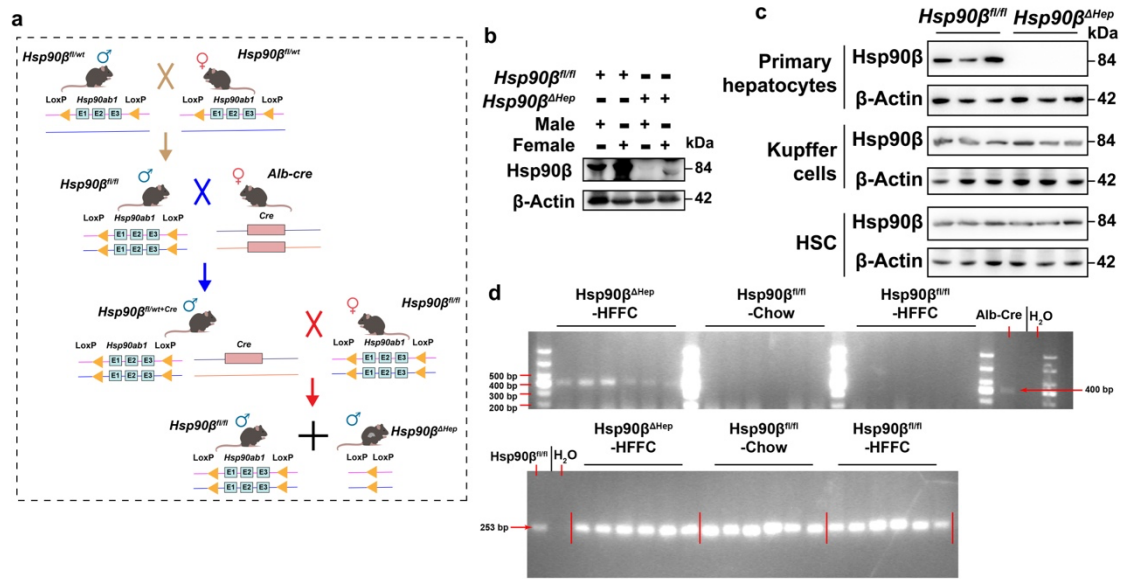

**Supplementary Figure 2 Generation and verification of *Hsp90β<sup>ΔHep</sup>* mice.** **a** Schematic illustration of the mating strategy to generate hepatocellular *Hsp90β* knockout mice (*Hsp90β<sup>ΔHep</sup>*) by crossing *Hsp90β<sup>fl/fl</sup>* and *Alb-Cre* mice. **b** Western blot analysis of *Hsp90β* in the liver tissues of male or female *Hsp90β<sup>fl/fl</sup>* or *Hsp90β<sup>ΔHep</sup>* mice. **c** Western blot analysis of primary hepatocyte, Kupffer cells and HSCs from *Hsp90β<sup>fl/fl</sup>* and *Hsp90β<sup>ΔHep</sup>* mice. **d** PCR confirmation of *Hsp90β<sup>fl/fl</sup>* and *Hsp90β<sup>ΔHep</sup>* mice using mouse tail DNA. Source data are provided in the Source Data file.

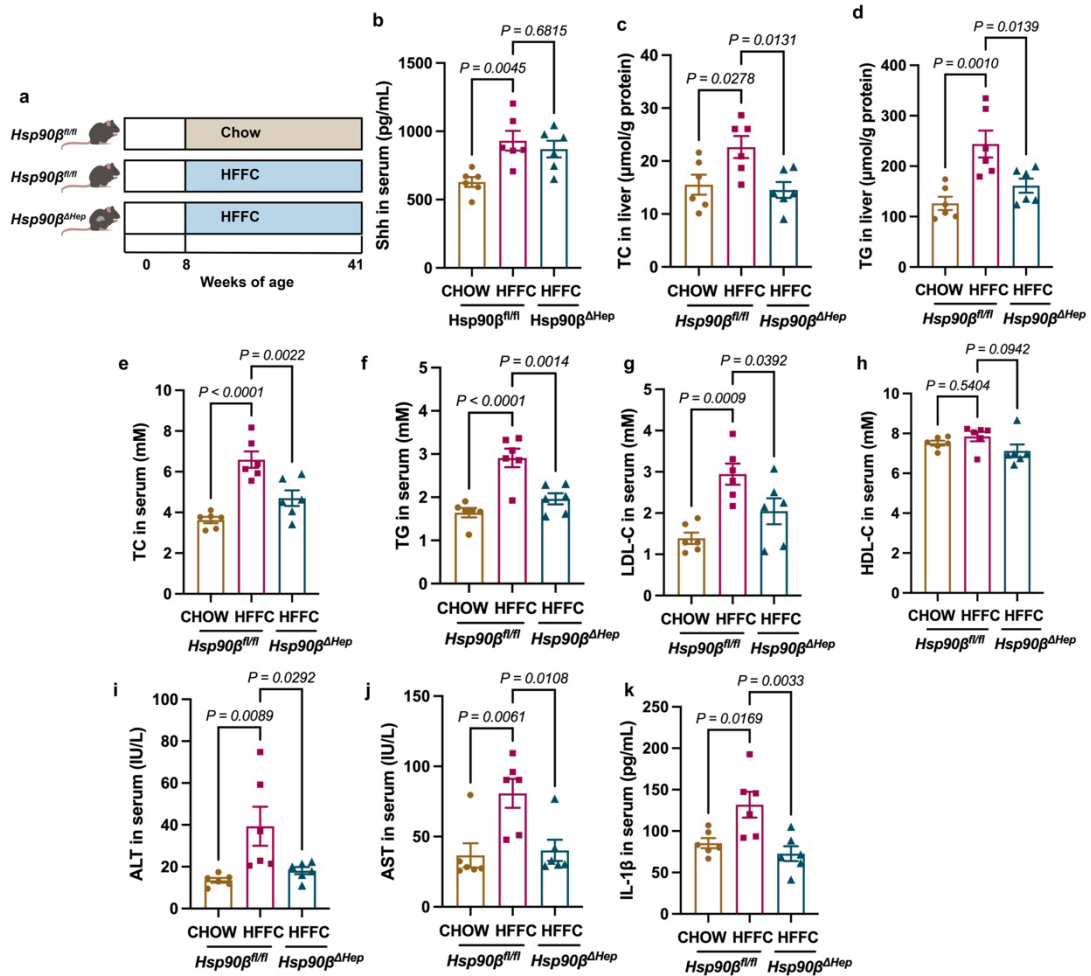

**Supplementary Figure 3** Hepatic deletion of *Hsp90β* ameliorates diet-induced NASH. **a** Experimental scheme. **b-k** Serum Shh (**b**), TC in liver (**c**), TG in liver (**d**), serum TC (**e**), serum TG (**f**), serum LDL-c (**g**), and serum HDL-c (**h**), Serum ALT (**i**), serum AST (**j**) and Serum IL-1β levels (**k**) of *Hsp90β<sup>fl/fl</sup>* and *Hsp90β<sup>ΔHep</sup>* mice on a normal chow or HFFC diet (*n* = 6 mice per group). Data are presented as mean ± SEM. *n* = 6 mice per group. Source data are provided in the Source Data file.

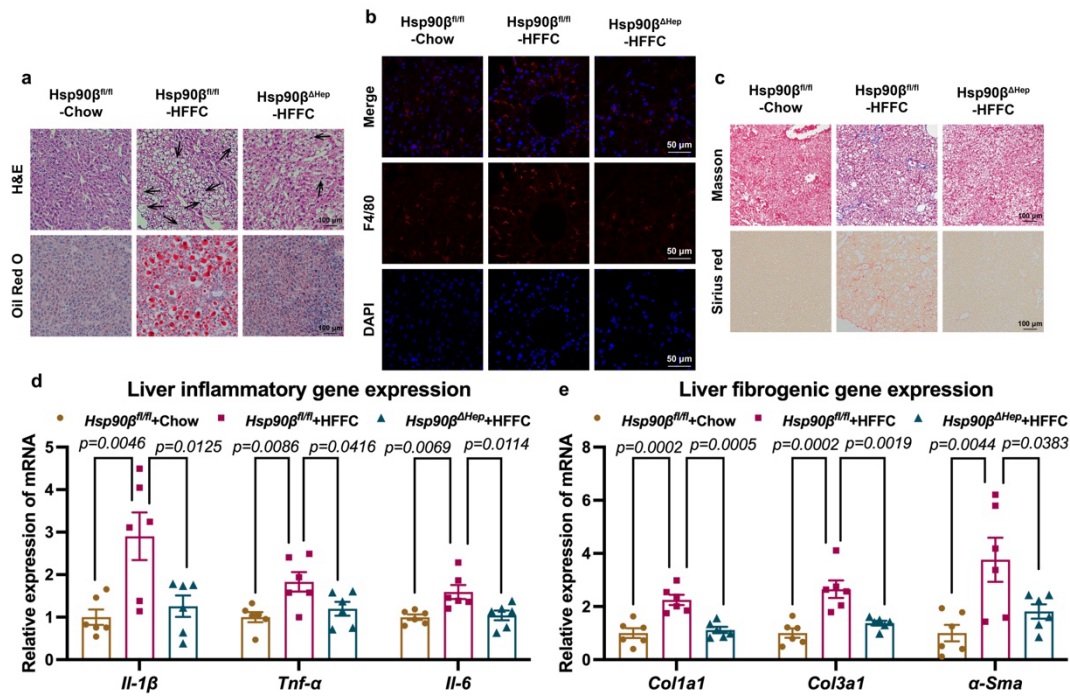

**Supplementary Figure 4 Hepatic deletion of *Hsp90β* prevents HFFC-induced NASH pathologies.**

**a** Representative H&E stained FFPE liver sections and ORO stained frozen liver sections. Each arrow indicated hepatocyte ballooning. **b** Representative immunofluorescence F4/80 stained liver sections **c** Representative Masson and Sirius red stained liver sections **d-e** Expression of inflammatory (**d**) and fibrogenic (**e**) genes in livers of *Hsp90β<sup>fl/fl</sup>* and *Hsp90β<sup>ΔHep</sup>* mice on a normal chow or HFFC diet ( $n = 6$  mice per group). Data are presented as mean  $\pm$  SEM.  $n = 6$  mice per group. Source data are provided in the Source Data file.

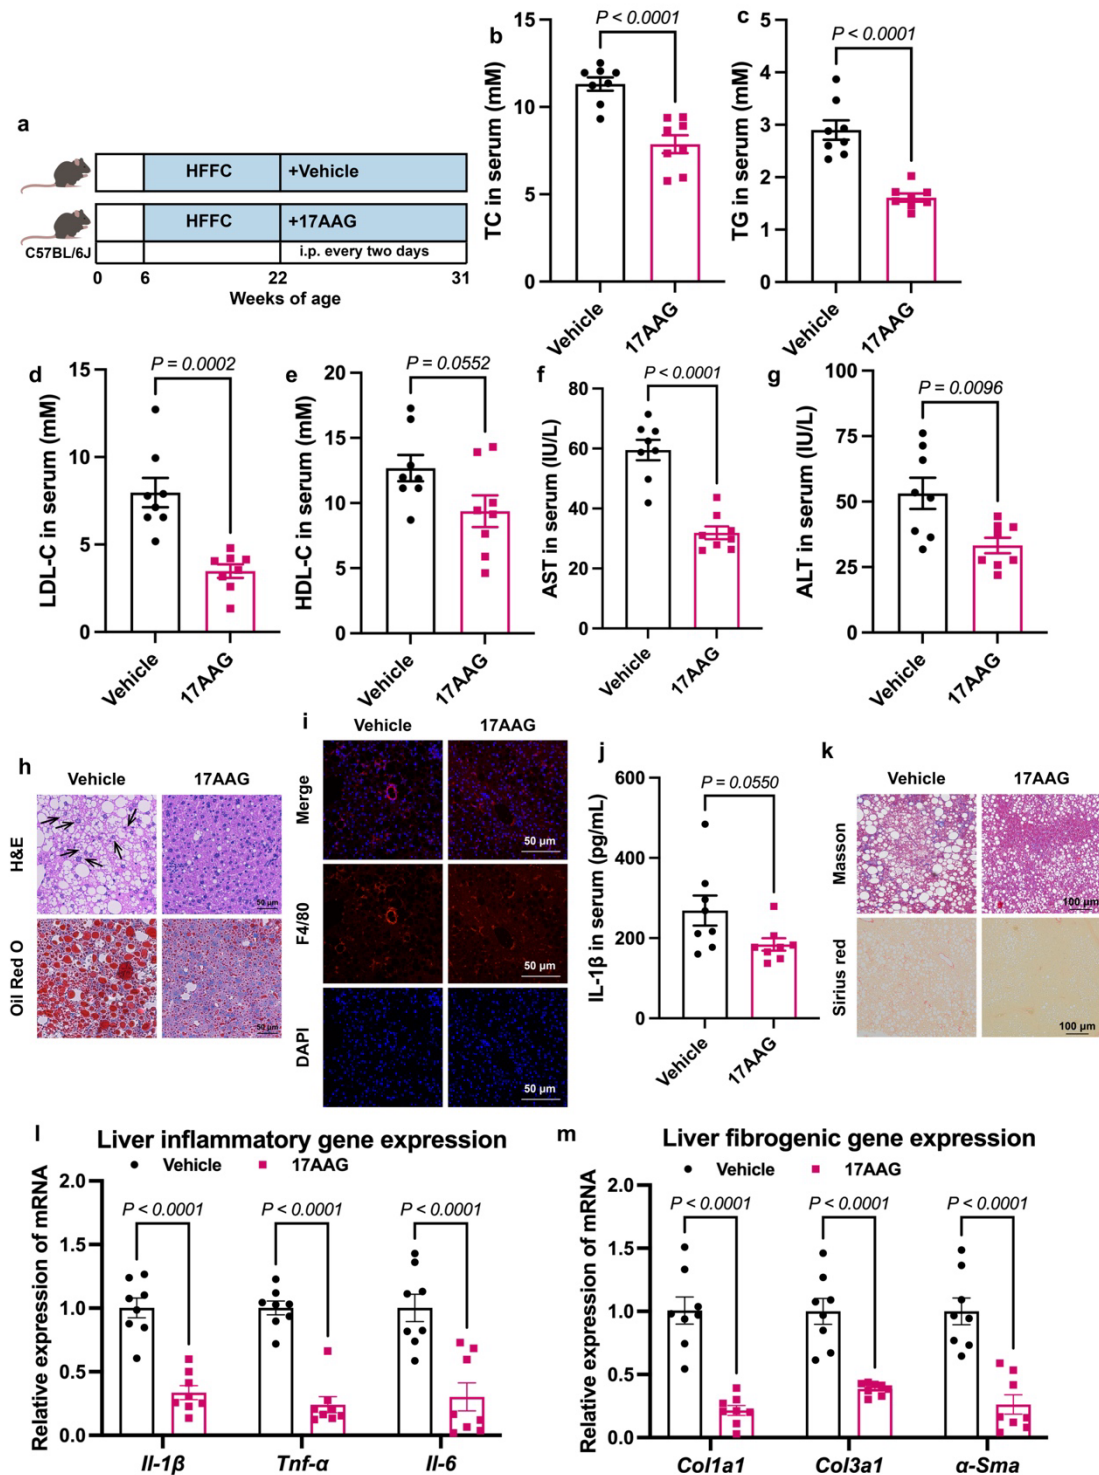

**Supplementary Figure 5 17AAG exerts protective effects against HFFC-induced NASH phenotype.** **a** Experimental scheme. **b-g** serum TC (**b**), serum TG (**c**), serum LDL-c (**d**), serum HDL-c (**e**), Serum AST (**f**), and serum ALT (**g**). **h** Representative H&E stained FFPE liver sections and ORO stained frozen liver sections. Each arrow indicated hepatocyte ballooning. **i** Representative immunofluorescence F4/80 stained liver sections. **j** Serum IL-1 $\beta$  levels. **k** Representative masson and sirius red stained liver sections. **l-m** Expression of inflammatory (**l**), and fibrogenic (**m**) genes in livers of mice on a HFFC diet administered with vehicle or 17AAG (1 mg/kg) ( $n = 8$  mice per group). Data are presented as mean  $\pm$

SEM.  $n = 8$  mice per group. Source data are provided in the Source Data file.

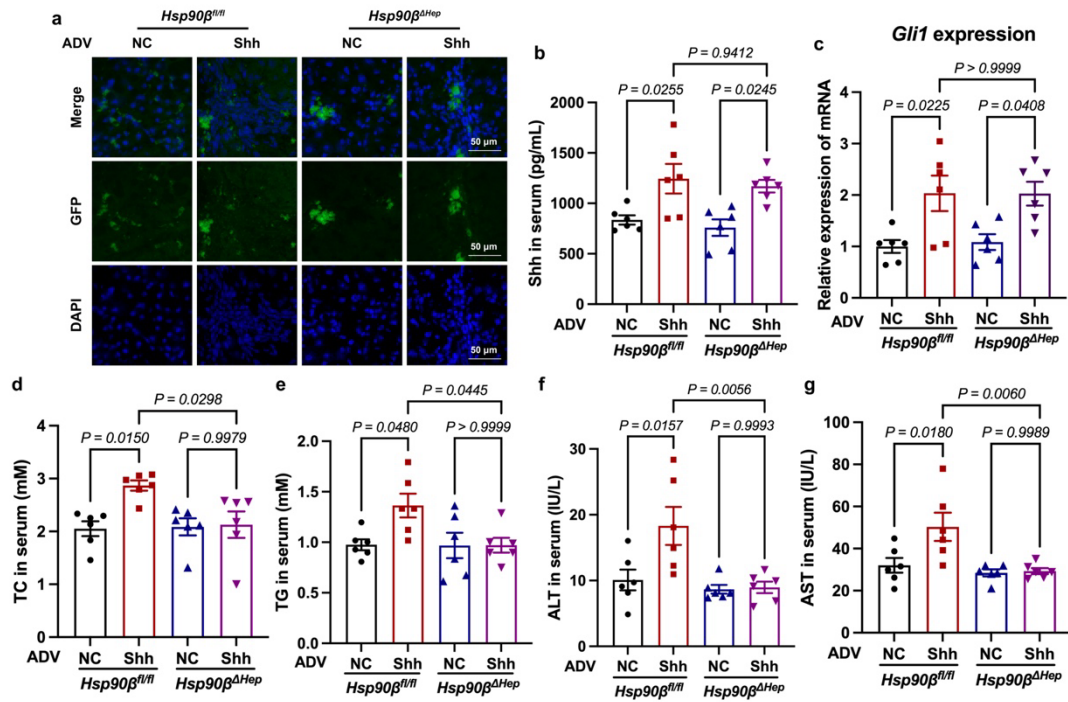

**Supplementary Figure 6 Shh overexpression in *Hsp90β<sup>ΔHep</sup>* mice.** **a** Representative immunofluorescence GFP stained liver sections of *Hsp90β<sup>fl/fl</sup>* and *Hsp90β<sup>ΔHep</sup>* mice injected with ADV–NC or ADV–Shh on HFFC diet ( $n = 6$  mice per group). **b–g** serum SHH (**b**), *Gli1* gene expression (**c**), serum TC (**d**), serum TG (**e**), serum ALT (**f**), and serum AST (**g**) of *Hsp90β<sup>fl/fl</sup>* and *Hsp90β<sup>ΔHep</sup>* mice injected with ADV–NC or ADV–Shh on HFFC diet ( $n = 6$  mice per group). Data are presented as mean  $\pm$  SEM.  $n = 6$  mice per group. Source data are provided in the Source Data file.

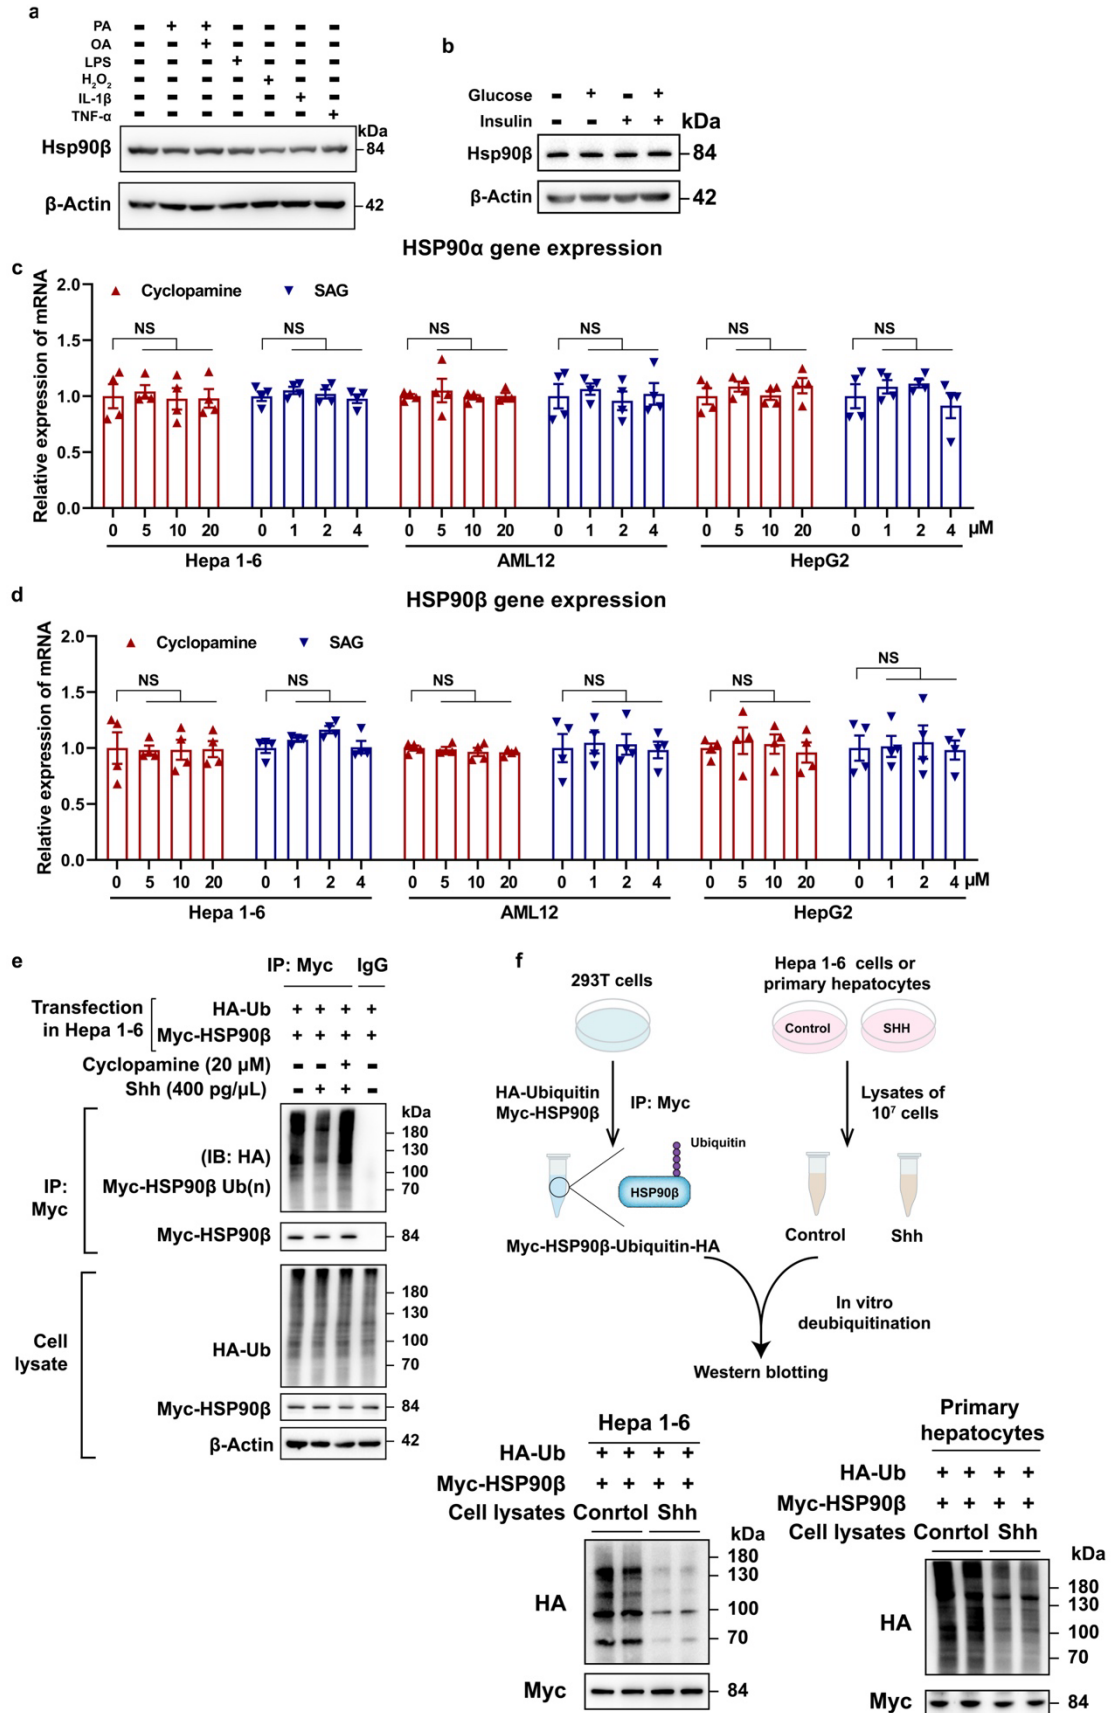

**Supplementary Figure 7 Shh mediates Hsp90 $\beta$  protein levels by deubiquitylation.** a-b (a) Western blot analysis of Hepa 1-6 cells treated with 400  $\mu$ M oleic acid (OA), 200  $\mu$ M Palmitic acid (PA), 1  $\mu$ g/mL



lipopolysaccharide (LPS), 10  $\mu$ M H<sub>2</sub>O<sub>2</sub>, 25 ng/mL IL-1 $\beta$ , 5 ng/mL TNF- $\alpha$ , **(b)** 30 mM glucose, or 100 nM insulin. **c-d** **(c)** *Hsp90 $\alpha$*  and **(d)** *Hsp90 $\beta$*  gene expression in Hepa 1-6, AML12 and HepG2 cells treated with cyclopamine or SAG. **e** HSP90 $\beta$  ubiquitylation assays were performed in primary hepatocytes treated with 400 pg/ $\mu$ L Shh with or without 20  $\mu$ M cyclopamine for 24 hours after plasmid Myc-HSP90 $\beta$  and HA-ubiquitin transfection. The cell lysates were incubated with immunoprecipitated Myc and then immunoblotted with anti-HA to reveal the ubiquitylation levels. **f** Schematic representation of *in vitro* deubiquitylation assay. The ubiquitylated Myc-HSP90 $\beta$  was immunoprecipitated from HEK293T cells, incubated with the lysates from Hepa 1-6 cells treated with or without 400 pg/ $\mu$ L Shh, and analyzed by immunoblotting. Data are presented as mean  $\pm$  SEM.  $n = 4$  independent experiments per group. Source data are provided in the Source Data file.

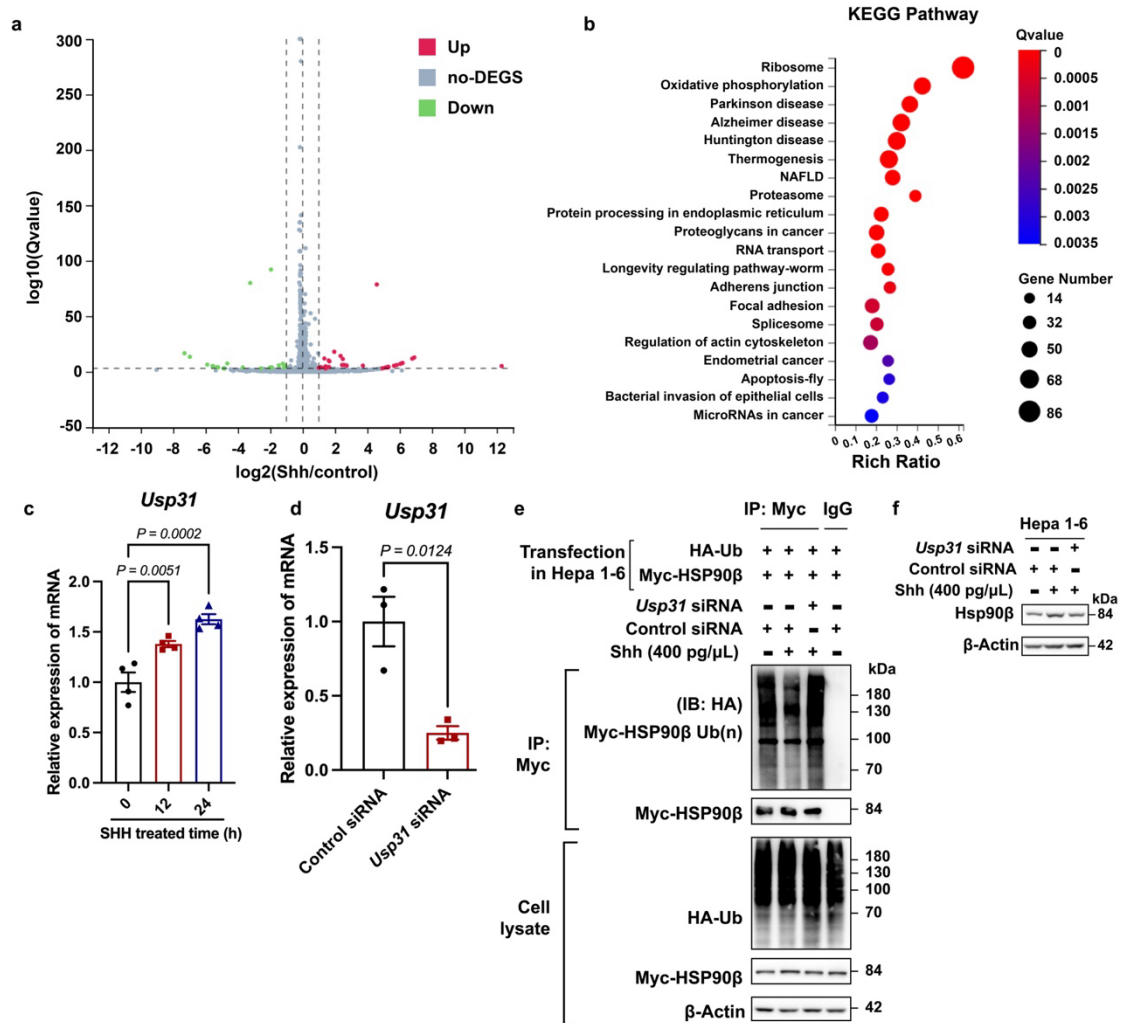

**Supplementary Figure 8 Usp31 is a DUB of Hsp90 $\beta$ .** **a** Heatmap analysis of RNA-seq data from Hepa 1-6 treated with water or Shh. Color represents log<sub>2</sub> fold changes between Shh and control. **b** KEGG

pathway of RNA-seq data from Hepa 1-6 treated with water or Shh. **c** *Usp31* gene expression in Hepa 1-6 cells treated with 400 pg/μl Shh for 12 and 24 hours. *n* = 4 independent experiments per group. **d** The knockdown efficiency of RNAi targeting *Usp31* assessed by qRT-PCR. *n* = 3 independent experiments per group. **e** HSP90β ubiquitylation assays were performed in Hepa 1-6 cells treated with 400 pg/μL Shh after *Usp31* knocked down and plasmid Myc-HSP90β and HA-ubiquitin transfection. The cell lysates were incubated with immunoprecipitated Myc and then immunoblotted with anti-HA to reveal the ubiquitylation levels. **f** Hepa 1-6 cells were transfected with *Usp31* RNAi for 48 hours, then cells were treated with 400 pg/μL Shh for 24 hours, Hsp90β protein level was analyzed by immunoblotting. Data are presented as mean ± SEM. Source data are provided in the Source Data file.

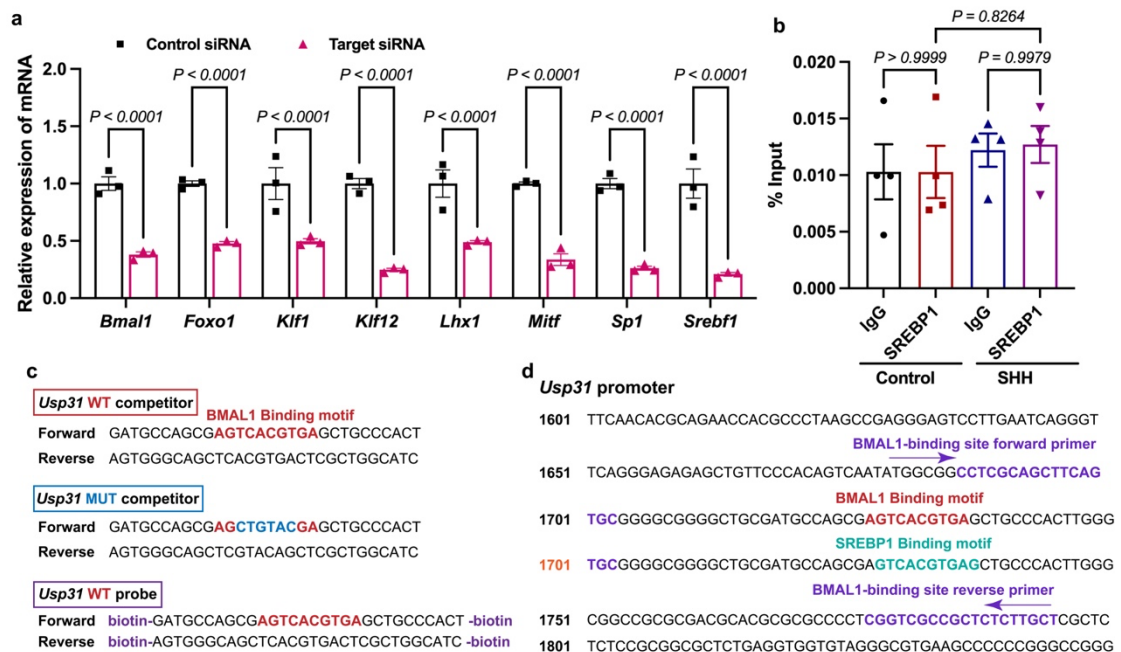

**Supplementary Figure 9 BMAL1 binds the *Usp31* promoter.** **a** The knockdown efficiency of 8 TFs was assessed by qRT-PCR. **b** In the presence/absence of Shh, the binding of SREBP1 to the *Usp31* promoter region was analyzed by ChIP analysis in Hepa 1-6 cells. **c** Putative BMAL1 and *Usp31* binding sites, EMSA probe in the *Usp31* promoter region. **d** Putative BMAL1 and *Usp31* binding sites, ChIP primers in the *Usp31* promoter region. Source data are provided in the Source Data file.

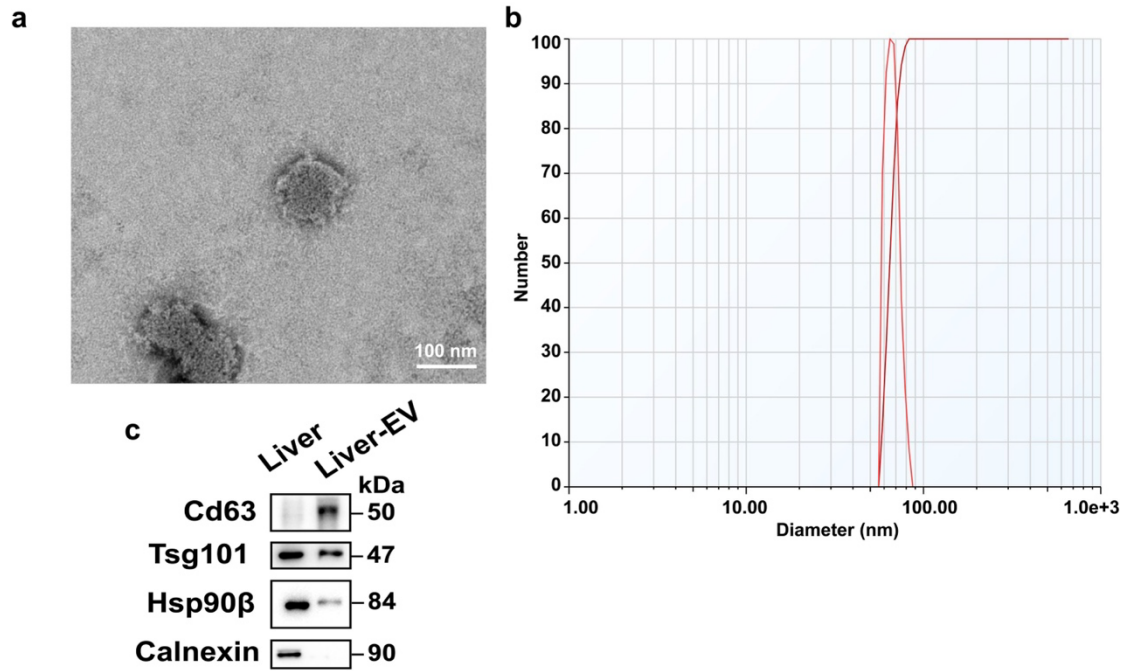

**Supplementary Figure 10 Characteristics of exosomes.** **a** Representative Transmission Electron Microscope (TEM) image of EVs derived from livers. **b** Particle diameter of EVs derived from livers. **c** Representative bands of Western blot for EV markers (Cd63, Tsg101, and Hsp90β) as well as the negative marker (Calnexin) in EVs derived from livers. Source data are provided in the Source Data file.

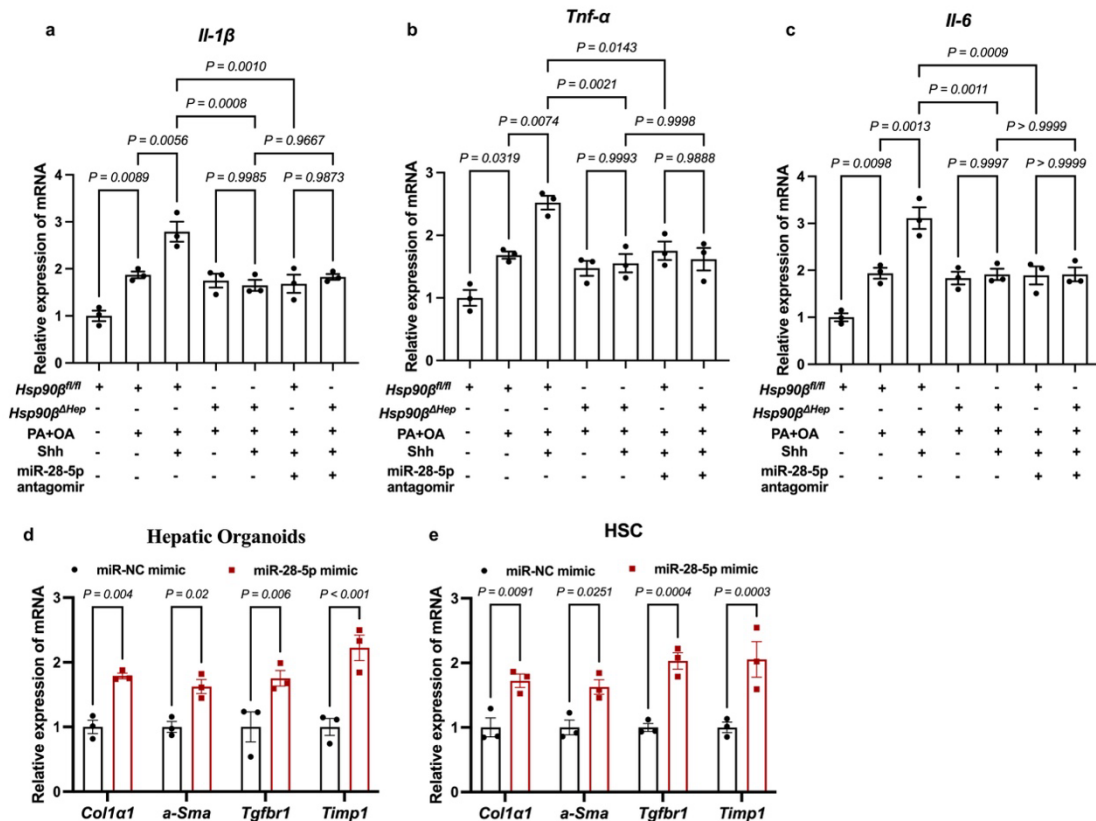

**Supplementary Figure 11 Shh induces inflammation in organoids.** **a-c** Organoids were treated as

indicated and the expression of inflammatory genes was analyzed by qRT-PCR (n = 3 independent experiments per group). **d** Fibrogenic genes expression in hepatic organoids when administrated with miR-NC mimic and miR-28-5p mimic (n = 3 independent experiments per group). **e** Fibrogenic genes expression in HSCs when administrated with miR-NC mimic and miR-28-5p mimic (n = 3 independent experiments per group). Data are presented as mean  $\pm$  SEM. Source data are provided in the Source Data file.

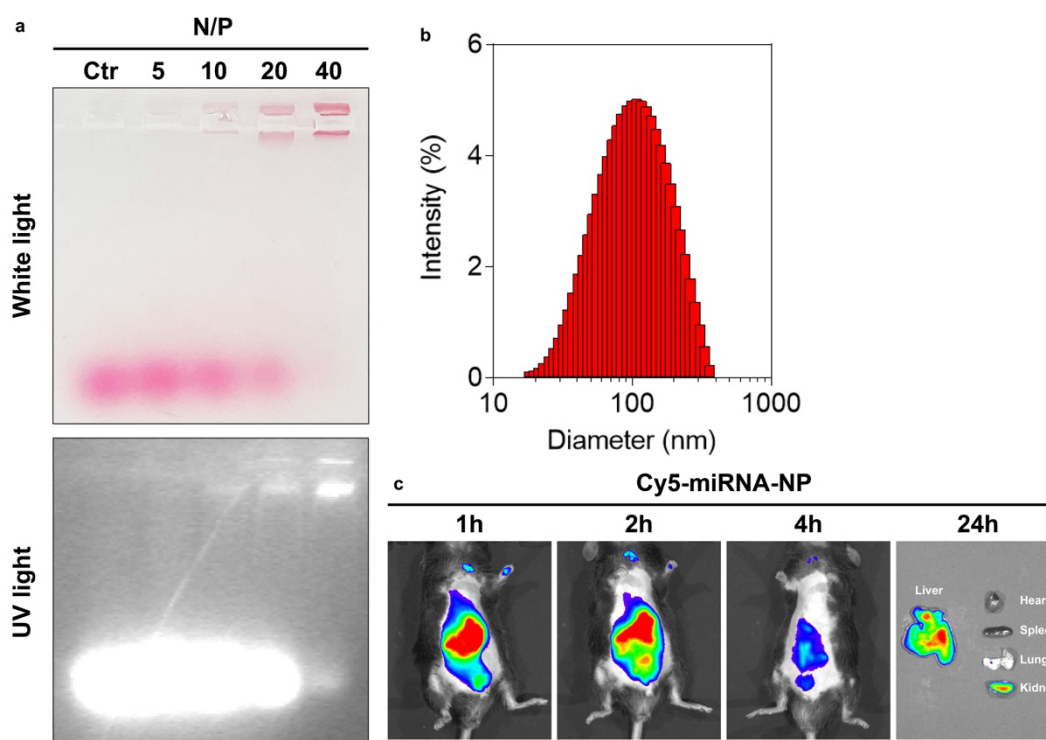

**Supplementary Figure 12 Validation of *in vivo* and *in vitro* characterization of NPs.** **a** Gel electrophoretic imaging of the binary complex of miR-28-5p antagomir /protamine with variable N:P ratios. **b** Particle size of binary complex of miR-28-5p antagomir /protamine incubated with BSA (n = 3 independent experiments per group). **c** *In vivo* imaging of the mice receiving intravenous injection of nano particles. *Ex vivo* imaging of different tissues collected from the mice at 24 h post injection of nano particles. Source data are provided in the Source Data file.

## Supplementary Tables

Supplementary Table 1. Key resources table

| REAGENT or RESOURCE                           | SOURCE         | IDENTIFIER |
|-----------------------------------------------|----------------|------------|
| Chemicals, peptides, and recombinant proteins |                |            |
| Cyclopamine                                   | MedChemExpress | HY-17024   |
| SAG                                           | Targetmol      | T1779      |
| 17AAG                                         | CSNpharm       | CSN17209   |
| DAPI                                          | Beyotime       | C1006      |

|                                              |                           |                                                         |
|----------------------------------------------|---------------------------|---------------------------------------------------------|
| Recombinant Murine Shh                       | PeprTech                  | 315-22                                                  |
| Recombinant Murine M-CSF                     | PeprTech                  | 315-02                                                  |
| RNA-easy Isolation Reagent                   | Vazyme                    | R701-01                                                 |
| HiScript Q RT SuperMix                       | Vazyme                    | R122-01                                                 |
| AceQ qPCR SYBR Green Master Mix              | Vazyme                    | Q111-02/03                                              |
| High fat, fructose and cholesterol diet      | Research Diets            | D09100310                                               |
| Collagenase D                                | Sigma                     | 11088866001                                             |
| DMEM                                         | Gibco                     | 11965092                                                |
| Fetal bovine serum                           | Gibco                     | 10099141C                                               |
| Critical commercial assays                   |                           |                                                         |
| BCA kit                                      | Beyotime                  | P0012                                                   |
| Triglyceride Assay Kit                       | Jiancheng Insitute        | Bioengineering<br>A110-1-1                              |
| Total Cholesterol Assay Kit                  | Jiancheng Insitute        | Bioengineering<br>A111-1-1                              |
| LDL-c Assay Kit                              | Jiancheng Insitute        | Bioengineering<br>A113-1-1                              |
| HDL-c Assay Kit                              | Jiancheng Insitute        | Bioengineering<br>A112-1-1                              |
| ALT Assay Kit                                | Jiancheng Insitute        | Bioengineering<br>C009-2-1                              |
| AST Assay Kit                                | Jiancheng Insitute        | Bioengineering<br>C010-2-1                              |
| Mouse SHH ELISA Kit                          | CUSABIO                   | CSB-EL021266MO                                          |
| Human SHH ELISA Kit                          | CUSABIO                   | CSB-E12005h                                             |
| Mouse IL-1 $\beta$ ELISA Kit                 | CUSABIO                   | CSB-E08054m                                             |
| Lipofectamine 3000                           | Thermo fisher scientific  | L3000001                                                |
| Lipofectamine-iMAX                           | Thermo fisher scientific  | 13778075                                                |
| SimpleChIP® Plus Sonication Chromatin IP Kit | Cell Signaling Technology | 56383                                                   |
| EMSA Kit                                     | Beyotime                  | GS009                                                   |
| percoll                                      | Biosharp                  | BS909                                                   |
| Experimental models: Organisms/strains       |                           |                                                         |
| Hepatocellular <i>Hsp90ab1</i> KO mice       | This paper                | N/A                                                     |
| C57BL/6 mice                                 | Vital River               | N/A                                                     |
| Oligonucleotides                             |                           |                                                         |
| Primers for RT PCR                           | This paper                | Supplementary Table 3                                   |
| miR-28-5P RT-PCR primer                      | Genepharma                | E17002                                                  |
| Software                                     |                           |                                                         |
| Illustrator                                  | Adobe                     | <a href="http://www.adobe.com">http://www.adobe.com</a> |

|                               |                         |                                                                                                                   |
|-------------------------------|-------------------------|-------------------------------------------------------------------------------------------------------------------|
| Photoshop                     | Adobe                   | <a href="http://www.adobe.com">http://www.adobe.com</a>                                                           |
| GraphPad Prism 8.0.2 software | GraphPad Software. Inc. | <a href="http://www.graphpad.com/scientificsoftware/prism/">http://www.graphpad.com/scientificsoftware/prism/</a> |

Supplementary Table 2. Antibody list

| Antibody                                 | Host Species | Type                    | Company name                    | Catalog number | Dilution |
|------------------------------------------|--------------|-------------------------|---------------------------------|----------------|----------|
| anti-Mouse                               | Goat         | Secondary, HRP          | Beyotime                        | A0216          | 1:1000   |
| anti-Rabbit                              | Goat         | Secondary, HRP          | Beyotime                        | A0208          | 1:1000   |
| anti-Rabbit, Dylight 555                 | Donkey       | Secondary, Flourescence | Beyotime                        | A0453          | 1:500    |
| Akt                                      | Rabbit       | Primary                 | Cell Signaling Technology (CST) | 4685           | 1:1000   |
| Beta Actin                               | Mouse        | Primary                 | Proteintech                     | 66009-1-Ig     | 1:50000  |
| Beta Tubulin                             | Rabbit       | Primary                 | Proteintech                     | 10094-1-AP     | 1:5000   |
| BMAL1                                    | Rabbit       | Primary                 | CST                             | 14020          | 1:1000   |
| Calnexin                                 | Rabbit       | Primary                 | Proteintech                     | 10427-2-AP     | 1:4000   |
| CD63                                     | Rabbit       | Primary                 | Abcam                           | ab217345       | 1:1000   |
| EN2                                      | Rabbit       | Primary                 | ABclonal                        | A17480         | 1:1000   |
| F4/80                                    | Rabbit       | Primary                 | Servicebio                      | GB113373-100   | 1:1000   |
| FOXJ3                                    | Rabbit       | Primary                 | Proteintech                     | 19751-1-AP     | 1:1000   |
| GAPDH                                    | Mouse        | Primary                 | Proteintech                     | 60004-1-Ig     | 1:100000 |
| GLI1                                     | Rabbit       | Primary                 | Proteintech                     | 66905-1-Ig     | 1:10000  |
| GPM6A                                    | Rabbit       | Primary                 | Proteintech                     | 15044-1-AP     | 1:5000   |
| HA                                       | Rabbit       | Primary                 | Abcam                           | ab9110         | 1:5000   |
| Hsp70                                    | Rabbit       | Primary                 | Abcam                           | ab2787         | 1:1000   |
| Hsp90 alpha                              | Rabbit       | Primary                 | Abcam                           | ab2928         | 1:1000   |
| Hsp90 beta                               | Rabbit       | Primary                 | Abcam                           | ab2927         | 1:5000   |
| IKK $\beta$                              | Rabbit       | Primary                 | CST                             | 2370           | 1:1000   |
| I $\kappa$ B $\alpha$                    | Rabbit       | Primary                 | CST                             | 9242           | 1:1000   |
| Myc                                      | Mouse        | Primary                 | CST                             | 2276           | 1:1000   |
| NF-kB p65                                | Rabbit       | Primary                 | Abcam                           | ab16502        | 1:1000   |
| NF-kB p65 (phospho S536)                 | Rabbit       | Primary                 | Abcam                           | ab76302        | 1:1000   |
| PCNA                                     | Mouse        | Primary                 | Beyotime                        | AF0261         | 1:1000   |
| Phospho-Akt (Ser473)                     | Rabbit       | Primary                 | CST                             | 5012           | 1:1000   |
| Phospho-IKK $\alpha/\beta$ (Ser176/180)  | Rabbit       | Primary                 | CST                             | 2697           | 1:1000   |
| Phospho-I $\kappa$ B $\alpha$ (Ser32/36) | Mouse        | Primary                 | CST                             | 9246           | 1:1000   |

|           |        |         |                             |            |        |
|-----------|--------|---------|-----------------------------|------------|--------|
| RAP1B     | Rabbit | Primary | Proteintech                 | 10840-1-AP | 1:1000 |
| SHH       | Rabbit | Primary | CST                         | 2207       | 1:1000 |
| SSRP1     | Rabbit | Primary | Proteintech                 | 15696-1-AP | 1:1000 |
| SUFU      | Rabbit | Primary | Proteintech                 | 26759-1-AP | 1:2000 |
| TNS3      | Rabbit | Primary | Proteintech                 | 20053-1-AP | 1:1000 |
| TSG101    | Rabbit | Primary | Abcam                       | ab125011   | 1:5000 |
| Ubiquitin | Mouse  | Primary | Santa Cruz<br>Biotechnology | sc-8017    | 1:1000 |

Supplementary Table 3. Oligo list

| Primers for qRT-PCR       |                        |                         |                         |
|---------------------------|------------------------|-------------------------|-------------------------|
| Species                   | Gene                   | Forward                 | Reverse                 |
| Mus<br>musculus           | Srebfl                 | GCAGCCACCATCTAGCCTG     | CAGCAGTGAGTCTGCCTTGAT   |
|                           | Srebfl2                | CAGGTGCAGACGGTACAGG     | CGACCCTTACTGGCACTTGAA   |
|                           | Fasn                   | GGAGGTGGTGATAGCCGGTAT   | TGGGTAATCCATAGAGCCAG    |
|                           | Hmgcs                  | AACTGGTGCAGAAATCTCTAGC  | GGTTGAATAGCTCAGAACTAGCC |
|                           | Il-1 $\beta$           | GCAACTGTTCTGAACCTCAACT  | ATCTTTTGGGGTCCGTCAACT   |
|                           | Tnf- $\alpha$          | GCCTCTTCTCATTCTGCTT     | TGGGAACCTTCTCATCCCTTTG  |
|                           | Il-6                   | TAGTCCTTCTACCCCAATTCC   | TTGGTCCTTAGCCACTCCTTC   |
|                           | Col1 $\alpha$ 1        | GCTCCTCTTAGGGGCCACT     | CCACGTCTCACCATTGGGG     |
|                           | Col3 $\alpha$ 1        | CTGTAACATGGAAACTGGGGAAA | CCATAGCTGAACTGAAAACCACC |
|                           | $\alpha$ -Sma          | CCCAGACATCAGGGAGTAATGG  | TCTATCGGATACTTCAGCGTCA  |
|                           | Smo                    | TTGTGCTCATCACCTTCA GC   | TGGCTTGGCATAGCACATAG    |
|                           | Usp31                  | GAGCAAAGCAGATTCTTCCAGG  | CTCAAGCTCCGGTCAGAAGTC   |
|                           | Gli1                   | CTACTCGGGGTTCAATGATGC   | TGTGGAGTTGGGGCTAGACAT   |
|                           | Hsp90aa1               | TGTTGCGGTACTACACATCTGC  | GTCCTTGGTCTCACCTGTGATA  |
|                           | Hsp90ab1               | GTCCGCCGTGTGTTTCATCAT   | GCACTTCTTGACGATGTTCTTGC |
|                           | Bmal1                  | TGACCCTCATGGAAGGTTAGAA  | GGACATTGCATTGCATGTTGG   |
|                           | Foxo1                  | CCCAGGCCGGAGTTAACC      | GTTGCTCATAAAGTCGGTGCT   |
|                           | Klf1                   | GGCGAACTTTGGCACCTAAGA   | AGAAGGGACGATGTCCAGTGT   |
|                           | Klf2                   | CAGCGCCCTTGAGAACAGAAT   | GTGGACGTTTGGAGACCCTTG   |
|                           | Lhx1                   | TTCCTCTGAACGTGTTGGAC    | TCGGTCAGGTTGCATTTACATT  |
| Mitf                      | CAAATGGCAAATACGTTACCCG | CTCCCTTTTTATGTTGGGAAGGT |                         |
| Sp1                       | GCCGCCTTTTCTCAGACTC    | TTGGGTGACTCAATTCTGCTG   |                         |
| Tgfb1                     | TCTGCATTGCACTTATGCTGA  | AAAGGGCGATCTAGTGATGGA   |                         |
| Timp1                     | GCAACTCGGACCTGGTCATAA  | CGGCCCGTGATGAGAACT      |                         |
| Homo<br>sapiens           | HSP90AA1               | GCTTGACCAATGACTGGGAAG   | AGCTCCTCACAGTTATCCATGA  |
|                           | HSP90AB1               | CATCTCCATGATTGGGCAGTT   | CTTTGACCCGCTCTCTTCTA    |
|                           | GAPDH                  | CTGGGCTACACTGAGCACC     | AAGTGGTCGTTGAGGGCAATG   |
| Oligo sequences for siRNA |                        |                         |                         |
| Species                   | Gene                   | Forward                 | Reverse                 |
|                           | Bmal1                  | AGCAAACUACAAGCCAACATT   | UGUUGGCUUGUAGUUUGCUTT   |

|                                                  |                        |                        |                        |
|--------------------------------------------------|------------------------|------------------------|------------------------|
| Mus<br>musculus                                  | Foxo1                  | GCAACGAUGACUUUGAUAAATT | UUAUCAAAAGUCAUCGUUGCTT |
|                                                  | Klf1                   | GGCGAACUUUGGCACCUAATT  | UUAGGUGCCAAAGUUCGCCTT  |
|                                                  | Klf12                  | GACCUUAGAUAGCGUUAUATT  | AUUAACGCUAUCUAAGGUCTT  |
|                                                  | Lhx1                   | GGUACCAAUGCGCCGGUUTT   | AACCGGCGCAUUUGGUACCTT  |
|                                                  | Mitf                   | GACGGUACCAUCACCUUUATT  | UAAAGGUGAUGGUACCGUCTT  |
|                                                  | Smo                    | GCAAGAUAACGAGACCAUTT   | AUGGUCUCGUUGAUCUUGCTT  |
|                                                  | Sp1                    | GCCCUAAUUACCACCAAUATT  | UAUUGGUGGUAUAAGGGCTT   |
|                                                  | Srebf1                 | CCAGCUCAUCAACAACCAATT  | UUGGUUGUUGAUGAGCUGGTT  |
|                                                  | Usp31                  | CCACAAACCUGCACUUUATT   | AUAAAGUGCAGGUUUGUGGTT  |
| Oligo sequences for miRNA mimicus and antagomirs |                        |                        |                        |
| Species                                          | Gene                   | Forward                | Reverse                |
| Mus<br>musculus                                  | miR-NC<br>mimic        | UUCUCCGAACGUGUCACGUTT  | ACGUGACACGUUCGGAGAATT  |
|                                                  | miR-28-5p<br>mimic     | AAGGAGCUCACAGUCUAUUGAG | CAAUAGACUGUGAGCUCCUUU  |
|                                                  | antagomiR-<br>NC       | CAGUACUUUUGUGUAGUACAA  |                        |
|                                                  | mir-28-5p<br>antagomiR | CUCAAUAGACUGUGAGCUCCUU |                        |
