# Supplementary material for: Sonic hedgehog-heat shock protein 90β axis promotes the development of nonalcoholic steatohepatitis in mice
Source: PubMed Central journal article supplement (PMC10859387; doi:10.1038/s41467-024-45520-8), 2024-02-12
Supplement: 41467_2024_45520_MOESM3_ESM.pdf [file 41467_2024_45520_MOESM3_ESM.pdf]

## Reporting Summary

Nature Portfolio wishes to improve the reproducibility of the work that we publish. This form provides structure for consistency and transparency in reporting. For further information on Nature Portfolio policies, see our [Editorial Policies](#) and the [Editorial Policy Checklist](#).

### Statistics

For all statistical analyses, confirm that the following items are present in the figure legend, table legend, main text, or Methods section.

- |     |           |
|-----|-----------|
| n/a | Confirmed |
|-----|-----------|
- The exact sample size ( $n$ ) for each experimental group/condition, given as a discrete number and unit of measurement
  - A statement on whether measurements were taken from distinct samples or whether the same sample was measured repeatedly
  - The statistical test(s) used AND whether they are one- or two-sided  
*Only common tests should be described solely by name; describe more complex techniques in the Methods section.*
  - A description of all covariates tested
  - A description of any assumptions or corrections, such as tests of normality and adjustment for multiple comparisons
  - A full description of the statistical parameters including central tendency (e.g. means) or other basic estimates (e.g. regression coefficient) AND variation (e.g. standard deviation) or associated estimates of uncertainty (e.g. confidence intervals)
  - For null hypothesis testing, the test statistic (e.g.  $F$ ,  $t$ ,  $r$ ) with confidence intervals, effect sizes, degrees of freedom and  $P$  value noted  
*Give  $P$  values as exact values whenever suitable.*
  - For Bayesian analysis, information on the choice of priors and Markov chain Monte Carlo settings
  - For hierarchical and complex designs, identification of the appropriate level for tests and full reporting of outcomes
  - Estimates of effect sizes (e.g. Cohen's  $d$ , Pearson's  $r$ ), indicating how they were calculated

*Our web collection on [statistics for biologists](#) contains articles on many of the points above.*

### Software and code

Policy information about [availability of computer code](#)

Data collection RNA-seq, TargetScan, miRDB, ABI 7500 Real-Time PCR System, Olympus Confocal FV3000, Endnote X9, Western images by chemiluminescence using Tanon 4600.

Data analysis Graphpad Prism 8.0.2 was used for data analysis.

For manuscripts utilizing custom algorithms or software that are central to the research but not yet described in published literature, software must be made available to editors and reviewers. We strongly encourage code deposition in a community repository (e.g. GitHub). See the Nature Portfolio [guidelines for submitting code & software](#) for further information.

### Data

Policy information about [availability of data](#)

All manuscripts must include a [data availability statement](#). This statement should provide the following information, where applicable:

- Accession codes, unique identifiers, or web links for publicly available datasets
- A description of any restrictions on data availability
- For clinical datasets or third party data, please ensure that the statement adheres to our [policy](#)

The raw RNA-seq data are available for download from NCBI Gene Expression Omnibus under the accession numbers GSE232758 and GSE232759. There are no restrictions on data availability in the current work. Source data are provided with this paper.

## Research involving human participants, their data, or biological material

Policy information about studies with [human participants or human data](#). See also policy information about [sex, gender \(identity/presentation\), and sexual orientation](#) and [race, ethnicity and racism](#).

|                                                                    |                                                                                                                                                                                                                                                                                                                                                                                                                                                                                                                                                                                                                                                                                                                                                                                                                                                                                                                                                                                                                                                                                                                                                                                                                            |
|--------------------------------------------------------------------|----------------------------------------------------------------------------------------------------------------------------------------------------------------------------------------------------------------------------------------------------------------------------------------------------------------------------------------------------------------------------------------------------------------------------------------------------------------------------------------------------------------------------------------------------------------------------------------------------------------------------------------------------------------------------------------------------------------------------------------------------------------------------------------------------------------------------------------------------------------------------------------------------------------------------------------------------------------------------------------------------------------------------------------------------------------------------------------------------------------------------------------------------------------------------------------------------------------------------|
| Reporting on sex and gender                                        | Sex and gender were not considered in our study design.                                                                                                                                                                                                                                                                                                                                                                                                                                                                                                                                                                                                                                                                                                                                                                                                                                                                                                                                                                                                                                                                                                                                                                    |
| Reporting on race, ethnicity, or other socially relevant groupings | N/A                                                                                                                                                                                                                                                                                                                                                                                                                                                                                                                                                                                                                                                                                                                                                                                                                                                                                                                                                                                                                                                                                                                                                                                                                        |
| Population characteristics                                         | The liver samples from patients are obtained from 5 healthy donors, 14 NAFL patients, 12 NASH patients. The serum samples were obtained from 19 healthy donors and 19 NASH patients.                                                                                                                                                                                                                                                                                                                                                                                                                                                                                                                                                                                                                                                                                                                                                                                                                                                                                                                                                                                                                                       |
| Recruitment                                                        | Human blood specimens were collected at multiple centers by qualified medical staff. Nine individuals with NASH and 19 controls without NASH were enrolled without any age or sex preference. We excluded individuals with known blood-transmitted infectious diseases, chronic inflammatory systemic diseases, and other significant disease like severe cardiac, liver, or kidney diseases or tumors. Human liver samples from patients with NAFLD were diagnosed by abdominal ultrasound and verified for liver histology. The liver samples were from treatment-naïve patients following bariatric surgery to rule out the experimental complications due to medication. Normal human liver tissue comprised the uninvolved surrounding tissue and was obtained from NAFLD-free donors undergoing partial hepatectomy for hepatocarcinoma. Information obtained from all participants and/or their relatives before sample collection was kept confidential. Informed consents were obtained from all participants and the experiments conformed to the principles outlined in the WMA Declaration of Helsinki and the Department of Health and Human Services Belmont Report. All participants received compensation. |
| Ethics oversight                                                   | All procedures were approved by the Ethical Committee of Guangdong Provincial People's Hospital (Guangdong Academy of Medical Sciences) and the Beijing You'An Hospital.                                                                                                                                                                                                                                                                                                                                                                                                                                                                                                                                                                                                                                                                                                                                                                                                                                                                                                                                                                                                                                                   |

Note that full information on the approval of the study protocol must also be provided in the manuscript.

## Field-specific reporting

Please select the one below that is the best fit for your research. If you are not sure, read the appropriate sections before making your selection.

Life sciences       Behavioural & social sciences       Ecological, evolutionary & environmental sciences

For a reference copy of the document with all sections, see [nature.com/documents/nr-reporting-summary-flat.pdf](https://nature.com/documents/nr-reporting-summary-flat.pdf)

## Life sciences study design

All studies must disclose on these points even when the disclosure is negative.

|                 |                                                                                                                                                                                                                                                                                                                                                                                                                                                                 |
|-----------------|-----------------------------------------------------------------------------------------------------------------------------------------------------------------------------------------------------------------------------------------------------------------------------------------------------------------------------------------------------------------------------------------------------------------------------------------------------------------|
| Sample size     | Sample size of each experiment is indicated in the figure legends. Sample sizes were based on the experience of the authors with molecular and in vivo studies as published in many studies. For animal models, experiments were designed to detect differences between treatment groups or genotype-dependent effects. Sample sizes may vary depending on animal availability. Sample size for cell based assays were determined based on sample availability. |
| Data exclusions | No exclusion of data was made.                                                                                                                                                                                                                                                                                                                                                                                                                                  |
| Replication     | All experimental data was reliably reproduced in multiple independent experiments as indicated in the figure legends. The replication number for each experiment is indicated in the legend of the corresponding figure.                                                                                                                                                                                                                                        |
| Randomization   | For in vitro studies, the cells from each cell line required for all tested conditions were pooled, equal number of cell were then seeded and stimulated/treated randomly. For in vivo studies, the animal were allocated to experimental groups to ensure equal litter/sex/age across groups.                                                                                                                                                                  |
| Blinding        | For in vitro experiments, investigators were not blinded to group allocation during data collection and analysis. For in vivo experiments, treatments/genotypes were not disclosed to investigators generating quantitative readouts during data collection but investigators were not blinded during data analysis.                                                                                                                                            |

## Reporting for specific materials, systems and methods

We require information from authors about some types of materials, experimental systems and methods used in many studies. Here, indicate whether each material, system or method listed is relevant to your study. If you are not sure if a list item applies to your research, read the appropriate section before selecting a response.

## Materials &amp; experimental systems

| n/a                                 | Involved in the study                                           |
|-------------------------------------|-----------------------------------------------------------------|
| <input type="checkbox"/>            | <input checked="" type="checkbox"/> Antibodies                  |
| <input type="checkbox"/>            | <input checked="" type="checkbox"/> Eukaryotic cell lines       |
| <input checked="" type="checkbox"/> | <input type="checkbox"/> Palaeontology and archaeology          |
| <input type="checkbox"/>            | <input checked="" type="checkbox"/> Animals and other organisms |
| <input checked="" type="checkbox"/> | <input type="checkbox"/> Clinical data                          |
| <input checked="" type="checkbox"/> | <input type="checkbox"/> Dual use research of concern           |
| <input checked="" type="checkbox"/> | <input type="checkbox"/> Plants                                 |

## Methods

| n/a                                 | Involved in the study                           |
|-------------------------------------|-------------------------------------------------|
| <input checked="" type="checkbox"/> | <input type="checkbox"/> ChIP-seq               |
| <input checked="" type="checkbox"/> | <input type="checkbox"/> Flow cytometry         |
| <input checked="" type="checkbox"/> | <input type="checkbox"/> MRI-based neuroimaging |

## Antibodies

## Antibodies used

The antibodies information is provided in Supplementary Table 2.

| Antibody                                             | Host   | Species        | Type           | Company name                    | Catalog number | Dilution   |
|------------------------------------------------------|--------|----------------|----------------|---------------------------------|----------------|------------|
| anti-Mouse                                           |        | Goat           | Secondary, HRP |                                 | Beyotime       | A0216      |
| 1:1000                                               |        |                |                |                                 |                |            |
| anti-Rabbit                                          | Goat   | Secondary, HRP |                | Beyotime                        |                | A0208      |
| anti-Rabbit, Dylight 555                             |        | Donkey         |                | Secondary, Fluorescence         |                | Beyotime   |
| A0453                                                | 1:500  |                |                |                                 |                |            |
| Akt                                                  | Rabbit | Primary        |                | Cell Signaling Technology (CST) |                | 4685       |
| Beta Actin                                           | Mouse  |                | Primary        | Proteintech                     |                | 66009-1-Ig |
| 1:50000                                              |        |                |                |                                 |                |            |
| Beta Tubulin                                         |        | Rabbit         |                | Primary                         | Proteintech    | 10094-1-AP |
| 1:5000                                               |        |                |                |                                 |                |            |
| BMAL1                                                | Rabbit |                | Primary        | CST                             | 14020          | 1:1000     |
| Calnexin                                             | Rabbit |                | Primary        | Proteintech                     |                | 10427-2-AP |
| 1:4000                                               |        |                |                |                                 |                |            |
| CD63                                                 | Rabbit |                | Primary        | Abcam                           | ab217345       | 1:1000     |
| EN2                                                  | Rabbit |                | Primary        | ABclonal                        | A17480         | 1:1000     |
| F4/80                                                | Rabbit |                | Primary        | Servicebio                      | GB113373-100   | 1:1000     |
| FOXJ3                                                | Rabbit |                | Primary        | Proteintech                     |                | 19751-1-AP |
| 1:1000                                               |        |                |                |                                 |                |            |
| GAPDH                                                | Mouse  |                | Primary        | Proteintech                     |                | 60004-1-Ig |
| GLI1                                                 | Rabbit |                | Primary        | Proteintech                     |                | 66905-1-Ig |
| 1:10000                                              |        |                |                |                                 |                |            |
| GPM6A                                                | Rabbit |                | Primary        | Proteintech                     |                | 15044-1-AP |
| 1:5000                                               |        |                |                |                                 |                |            |
| HA                                                   | Rabbit |                | Primary        | Abcam                           | ab9110         | 1:5000     |
| Hsp70                                                | Rabbit |                | Primary        | Abcam                           | ab2787         | 1:1000     |
| Hsp90 alpha                                          |        | Rabbit         | Primary        | Abcam                           |                | ab2928     |
| Hsp90 beta                                           |        | Rabbit         | Primary        | Abcam                           |                | ab2927     |
| IKK $\beta$                                          | Rabbit |                | Primary        | CST                             | 2370           | 1:1000     |
| I $\kappa$ B $\alpha$                                | Rabbit |                | Primary        | CST                             | 9242           | 1:1000     |
| Myc                                                  | Mouse  |                | Primary        | CST                             | 2276           | 1:1000     |
| NF- $\kappa$ B p65                                   | Rabbit |                | Primary        | Abcam                           | ab16502        | 1:1000     |
| NF- $\kappa$ B p65 (phospho S536)                    |        | Rabbit         | Primary        | Abcam                           |                | ab76302    |
| 1:1000                                               |        |                |                |                                 |                |            |
| PCNA                                                 | Mouse  |                | Primary        | Beyotime                        | AF0261         | 1:1000     |
| Phospho-Akt (Ser473)                                 |        | Rabbit         | Primary        | CST                             |                | 5012       |
| Phospho-I $\kappa$ B $\alpha$ / $\beta$ (Ser176/180) |        | Rabbit         | Primary        | CST                             |                | 2697       |
| 1:1000                                               |        |                |                |                                 |                |            |
| Phospho-I $\kappa$ B $\alpha$ (Ser32/36)             |        | Mouse          | Primary        | CST                             |                | 9246       |
| 1:1000                                               |        |                |                |                                 |                |            |
| RAP1B                                                | Rabbit |                | Primary        | Proteintech                     |                | 10840-1-AP |
| 1:1000                                               |        |                |                |                                 |                |            |
| SHH                                                  | Rabbit |                | Primary        | CST                             | 2207           | 1:1000     |
| SSRP1                                                | Rabbit |                | Primary        | Proteintech                     |                | 15696-1-AP |
| 1:1000                                               |        |                |                |                                 |                |            |
| SUFU                                                 | Rabbit |                | Primary        | Proteintech                     |                | 26759-1-AP |
| 1:2000                                               |        |                |                |                                 |                |            |
| TNS3                                                 | Rabbit |                | Primary        | Proteintech                     |                | 20053-1-AP |
| 1:1000                                               |        |                |                |                                 |                |            |
| TSG101                                               | Rabbit |                | Primary        | Abcam                           | ab125011       | 1:5000     |
| Ubiquitin                                            | Mouse  |                | Primary        | Santa Cruz Biotechnology        |                | sc-8017    |
| 1:1000                                               |        |                |                |                                 |                |            |

## Validation

All antibodies used are commercially available and validated by the manufacturers, as indicated on the respective websites of each commercial vendor. Please refer to the commercial website of each primary antibody for more details.

## Eukaryotic cell lines

Policy information about [cell lines and Sex and Gender in Research](#)

|                                                                   |                                                                                                                                                                                                                |
|-------------------------------------------------------------------|----------------------------------------------------------------------------------------------------------------------------------------------------------------------------------------------------------------|
| Cell line source(s)                                               | The Hepa 1-6, HepG2, and HEK293T cell lines were obtained from Cell Bank of the Chinese Academy of Sciences (Shanghai, China). All these cell lines have been provided in "Cell Culture" section.              |
| Authentication                                                    | All cell lines have been verified by morphology check under microscopy and short tandem-repeat DNA profiling before the study.                                                                                 |
| Mycoplasma contamination                                          | The Hepa 1-6, HepG2, and HEK293T cell lines were used immediately after being received from the Type Culture Collection of the Chinese Academy of Sciences (Shanghai, China) and certified as Mycoplasma free. |
| Commonly misidentified lines (See <a href="#">ICLAC</a> register) | No commonly misidentified cell lines were used in this study.                                                                                                                                                  |

## Animals and other research organisms

Policy information about [studies involving animals](#); [ARRIVE guidelines](#) recommended for reporting animal research, and [Sex and Gender in Research](#)

|                         |                                                                                                                                                                                                                                                                                                                                                                                                                                                                                                                                                                                                                                                                                                                                                                                                                                                                                                                                                                                                                                                                                                                                                                                                                                                                                                                                                                                                                                                                                                                                                                                                                                                                                                                                                                                                                                                                                                                                                                                                                                                                                                  |
|-------------------------|--------------------------------------------------------------------------------------------------------------------------------------------------------------------------------------------------------------------------------------------------------------------------------------------------------------------------------------------------------------------------------------------------------------------------------------------------------------------------------------------------------------------------------------------------------------------------------------------------------------------------------------------------------------------------------------------------------------------------------------------------------------------------------------------------------------------------------------------------------------------------------------------------------------------------------------------------------------------------------------------------------------------------------------------------------------------------------------------------------------------------------------------------------------------------------------------------------------------------------------------------------------------------------------------------------------------------------------------------------------------------------------------------------------------------------------------------------------------------------------------------------------------------------------------------------------------------------------------------------------------------------------------------------------------------------------------------------------------------------------------------------------------------------------------------------------------------------------------------------------------------------------------------------------------------------------------------------------------------------------------------------------------------------------------------------------------------------------------------|
| Laboratory animals      | <p>Male C57BL/6J mice were purchased from Beijing Vital River Laboratory Animal Technology (Beijing, China) and housed in a specific-pathogen-free facility. All mice used herein were maintained in a temperature- (<math>22 \pm 2</math> °C) and humidity-controlled (40-70%) animal facility under a 12 h/12 h light/dark cycle and allowed free access to food and water. As shown in Fig. 1a, the mice were fed a high fat, high fructose, and high cholesterol diet (HFFC containing 40 kcal% fat (mostly palm oil), 20 kcal% fructose, and 2% cholesterol; #D09100310, Research Diets) or a normal chow diet for 16 weeks with ad libitum access. Subsequently, vehicle or cyclopamine (20 mg/kg) was intraperitoneally injected every 2 days for 9 weeks as indicated.</p> <p>To evaluate the effects of 17AAG, mice were fed HFFC or a normal chow diet ad libitum for 16 weeks (Supplementary Fig. 4a), following which, vehicle or 17AAG (1 mg/kg) was every 2 days for 9 weeks to the respective groups.</p> <p>Hsp90<math>\beta</math>-flox mice were generated by Viewsolid Biotech using the CRISPR-cas9 system. sgRNA-directed cas9 endonuclease cleavage inserted LoxP sites at both ends of exons 1-3 by homologous recombination (Supplementary Fig. 2a). Hsp90<math>\beta</math>-flox mice were then mated with Albumin-Cre mice to produce the Hsp90<math>\beta</math> fl/fl; Alb-cre+/wt (Hsp90<math>\beta</math><math>\Delta</math>Hep) mice (Supplementary Fig. 2a-c). The 8-weeks old Hsp90<math>\beta</math> fl/fl or Hsp90<math>\beta</math><math>\Delta</math>Hep mice were fed chow or HFFC diet for 33 weeks. At the 9th week, mice were injected with ADV-NC or ADV-Shh <math>1.0 \times 10^9</math> pfu per mouse through their tail veins and fed HFFC diet for an additional 9 weeks (Fig. 3a).</p> <p>To evaluate the therapeutic effects of miRNA inhibitors, mice were fed chow or HFFC diet for 8 weeks. Subsequently, nanoparticles encapsulating miR-NC or miR-28-5p antagomir were intravenously injected (5 nmol/mouse, twice a week) for 4 weeks.</p> |
| Wild animals            | This study did not involve wild animals.                                                                                                                                                                                                                                                                                                                                                                                                                                                                                                                                                                                                                                                                                                                                                                                                                                                                                                                                                                                                                                                                                                                                                                                                                                                                                                                                                                                                                                                                                                                                                                                                                                                                                                                                                                                                                                                                                                                                                                                                                                                         |
| Reporting on sex        | Only male mice participated in this experimental study.                                                                                                                                                                                                                                                                                                                                                                                                                                                                                                                                                                                                                                                                                                                                                                                                                                                                                                                                                                                                                                                                                                                                                                                                                                                                                                                                                                                                                                                                                                                                                                                                                                                                                                                                                                                                                                                                                                                                                                                                                                          |
| Field-collected samples | This study did not involve samples collected from the field.                                                                                                                                                                                                                                                                                                                                                                                                                                                                                                                                                                                                                                                                                                                                                                                                                                                                                                                                                                                                                                                                                                                                                                                                                                                                                                                                                                                                                                                                                                                                                                                                                                                                                                                                                                                                                                                                                                                                                                                                                                     |
| Ethics oversight        | The cervical dislocation was used for mice euthanasia. All animal care and related experiments outlined in this study were performed in accordance with the Guidelines for the Care and Use of Laboratory Animals drafted by the US National Institutes of Health (NIH Publication, 8th Edition, 2011). Animal experiments were conducted following the Guidelines for Animal Experimentation of China Pharmaceutical University, and the protocols were approved by the Science and Technology Department of Jiangsu Province (SYXK (SU) 2016-0011).                                                                                                                                                                                                                                                                                                                                                                                                                                                                                                                                                                                                                                                                                                                                                                                                                                                                                                                                                                                                                                                                                                                                                                                                                                                                                                                                                                                                                                                                                                                                            |

Note that full information on the approval of the study protocol must also be provided in the manuscript.

## Plants

|                       |     |
|-----------------------|-----|
| Seed stocks           | N/A |
| Novel plant genotypes | N/A |
| Authentication        | N/A |
